# Supplementary material for: Surface engineering based on ionic liquids for efficient and stable CsPbI3 perovskite solar cells
Source: Royal Society of Chemistry journal article supplement (doi:10.1039/d3ta06841b), 2024-01-01
Supplement: d3ta06841b1.pdf [file d3ta06841b1.pdf]

## Supporting Information

### Surface Engineering Based on Ionic Liquids for Efficient and Stable CsPbI<sub>3</sub> Perovskite Solar Cells

Dong Rui,<sup>a,#</sup> Jianfei Fu,<sup>b,#</sup> Qiaoyun Chen,<sup>a</sup> Ji Cao,<sup>a</sup> Wenting Wu,<sup>a</sup> Lei Chen,<sup>c</sup> Jing Zhang,<sup>c</sup> Zelong Zhang,<sup>a,\*</sup> Yi Zhou<sup>a,\*</sup> and Bo Song<sup>a,\*</sup>

<sup>a</sup> Laboratory of Advanced Optoelectronic Materials, Suzhou Key Laboratory of Novel Semiconductor-optoelectronics Materials and Devices, College of Chemistry, Chemical Engineering and Materials Science, Soochow University, Suzhou 215123, P. R. China

<sup>b</sup> School of Materials Science and Engineering (MSE), NingboTech University, Ningbo, 315211, P. R. China

<sup>c</sup> School of Material Science & Engineering, National Experimental Demonstration Center for Materials Science & Engineering, Jiangsu Province Cultivation base for State Key Laboratory of Photovoltaic Science and Technology, Changzhou University,

Changzhou, Jiangsu 213164, P. R. China

[#] Dong Rui and Jianfei Fu contributed equally to this work.

[\*] Corresponding authors: [songbo@suda.edu.cn](mailto:songbo@suda.edu.cn) (B. Song); [yizhou@suda.edu.cn](mailto:yizhou@suda.edu.cn) (Y. Zhou); [zljzhang@suda.edu.cn](mailto:zljzhang@suda.edu.cn) (Z. Zhang)

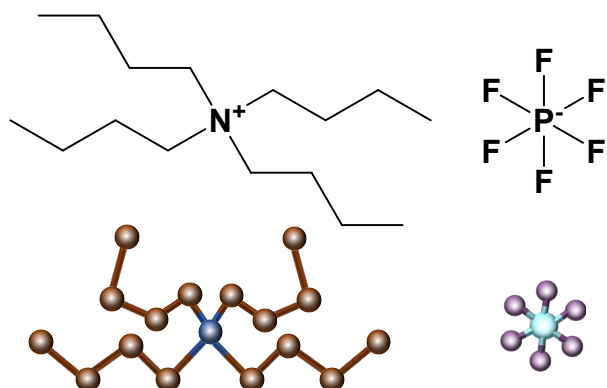

**Fig. S1.** Chemical structures and corresponding structural diagrams of TBAPF<sub>6</sub>.

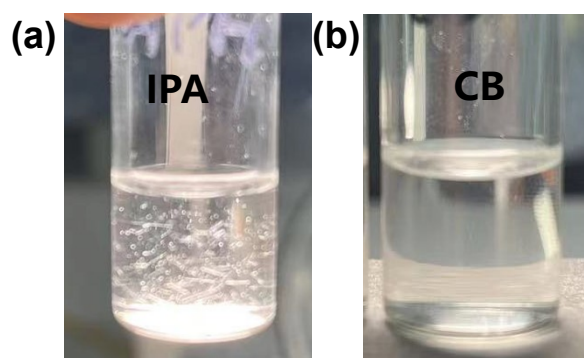

**Fig. S2.** The solubility of TBAPF<sub>6</sub> in (a) isopropanol and (b) chlorobenzene. According to previous reports, isopropyl alcohol (IPA) and chlorobenzene (CB) were common solvents for Surface treatment of as-deposited CsPbI<sub>3</sub> films and were used in this work.<sup>1-3</sup> The same amount of TBAPF<sub>6</sub> was added in equal volume of IPA or CB. After stirring, TBAPF<sub>6</sub> couldn't dissolve in IPA and there was a large amount of precipitation at room temperature. With heating, TBAPF<sub>6</sub> gradually dissolved in IPA and a colorless and transparent solution would be observed. However, crystal particles would precipitate rapidly after cooling down (Fig. S2a). In contrast, TBAPF<sub>6</sub> could well dissolve in CB to form a colorless and transparent solution at room temperature (Fig. S2b).

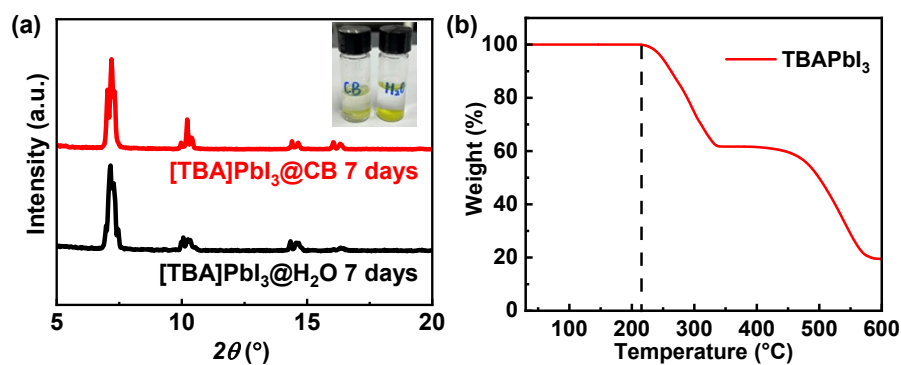

**Fig. S3.** (a) X-ray diffraction patterns of the [TBA]PbI<sub>3</sub> single crystal immersed in deionized water or CB for 7 days. (b) TGA curve of the low-dimensional material

[TBA]PbI<sub>3</sub>.

On one hand, under the consideration of moisture stability of synthetic [TBA]PbI<sub>3</sub> single crystals, [TBA]PbI<sub>3</sub> was immersed in deionized water at room temperature for 7 days. On the other hand, the using of hole transport material (HTM) in this work is Spiro-OMeTAD and CB is the common solvent for Spiro-OMeTAD.<sup>4-6</sup> Therefore, the spinning coating of hole transport layer (HTL) could cause damage to perovskite layer, and the similar experiment was conducted by soaking [TBA]PbI<sub>3</sub> into CB. Herein, we used XRD to estimate the degradation of [TBA]PbI<sub>3</sub> single crystals (Fig. S3a).

[TBA]PbI<sub>3</sub> single crystals exhibited excellent thermal stability by thermogravimetric analysis (TGA) measurement. The weight loss of synthetic [TBA]PbI<sub>3</sub> single crystals was only 1 wt% when temperature increased up to 220 °C, and the apparent weight losses happened at temperature ranges from 220 °C to 400 °C and from 400 °C to 600 °C, corresponding to volatilization of TBAI and sublimation of PbI<sub>2</sub>, respectively.<sup>7</sup>

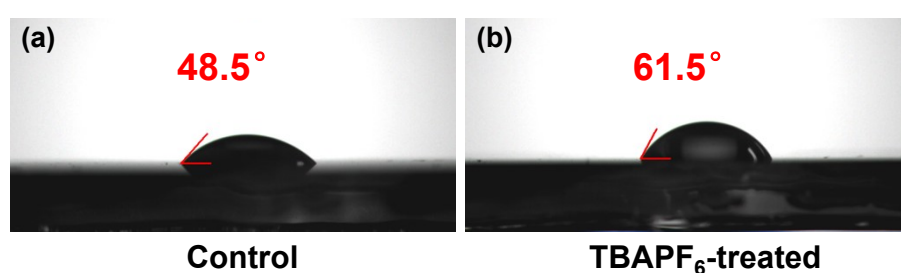

**Fig. S4.** Water contact angle measurements on the surface of (a) control and (b) TBAPF<sub>6</sub>-treated films.

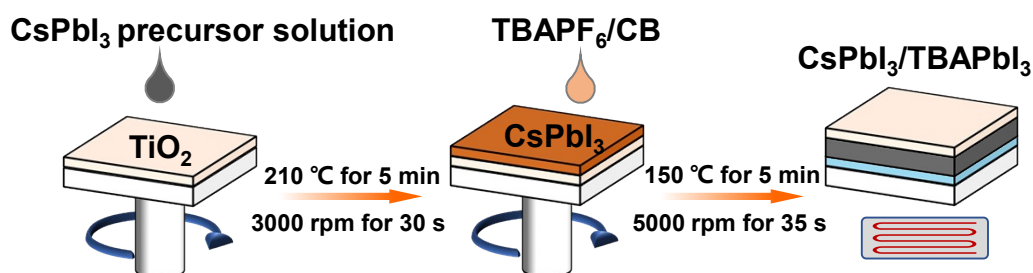

**Fig. S5.** Schematic diagram of the preparation of CsPbI<sub>3</sub> films with surface treatment of TBAPF<sub>6</sub>.

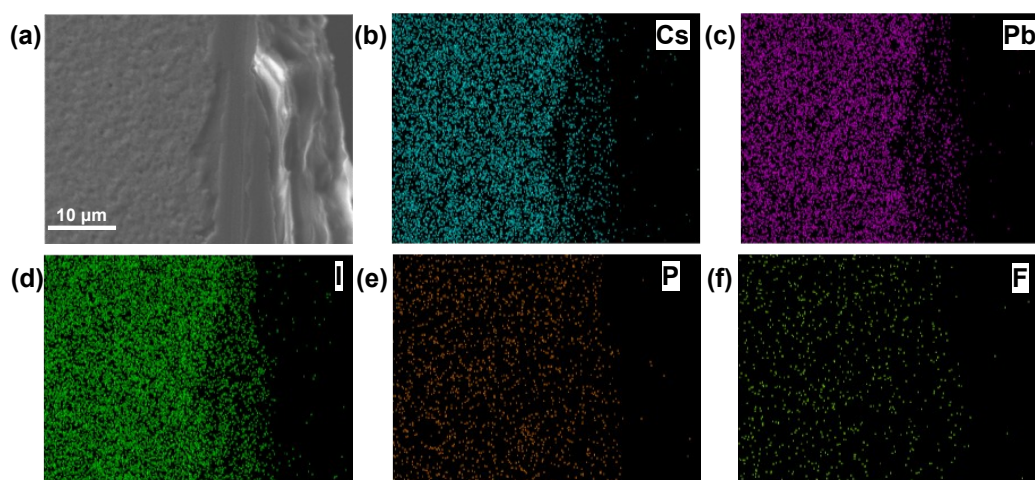

**Fig. S6.** (a) SEM image of TBAPF<sub>6</sub>-treated film, (b-f) Elemental analysis spectra of Cs, Pb, I, P, and F.

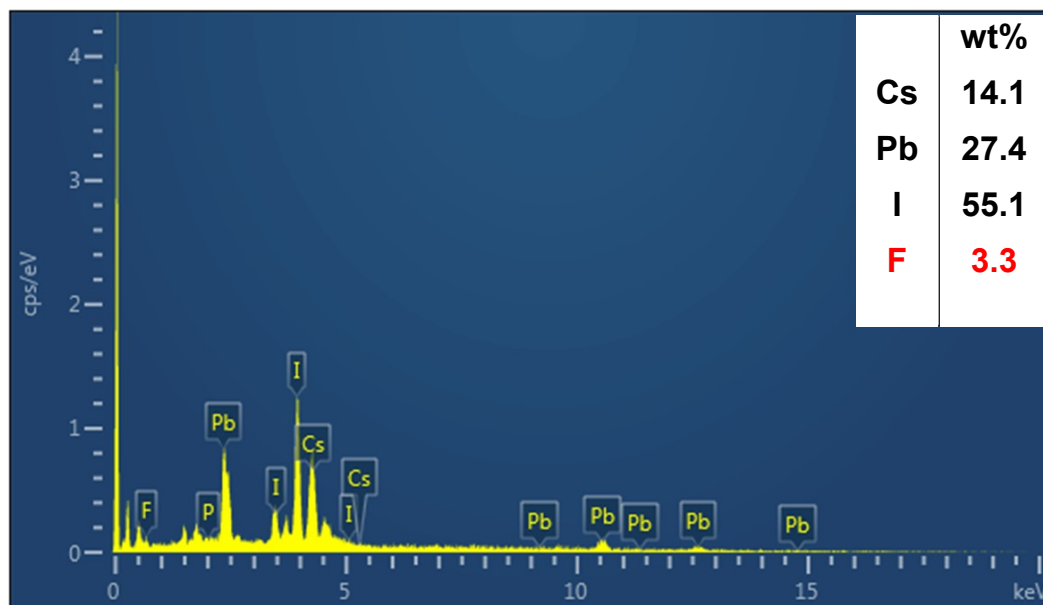

**Fig. S7.** Relative content analysis results of different elements on the surface of the TBAPF<sub>6</sub>-treated film.

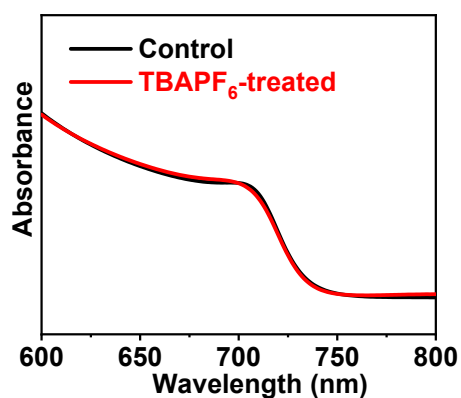

**Fig. S8.** UV-vis absorption spectra of the control and TBAPF<sub>6</sub>-treated films.

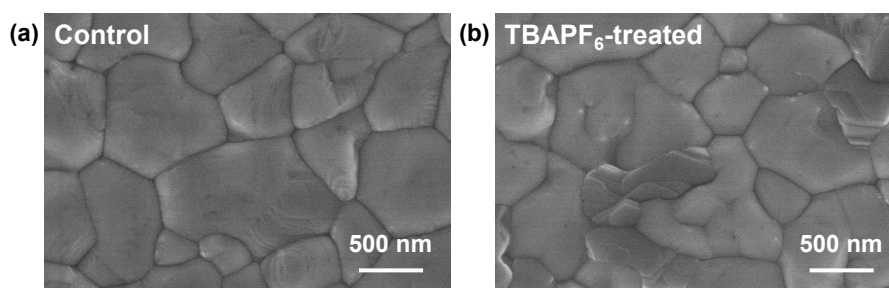

**Fig. S9.** SEM images of (a) control and (b) TBAPF<sub>6</sub>-treated films.

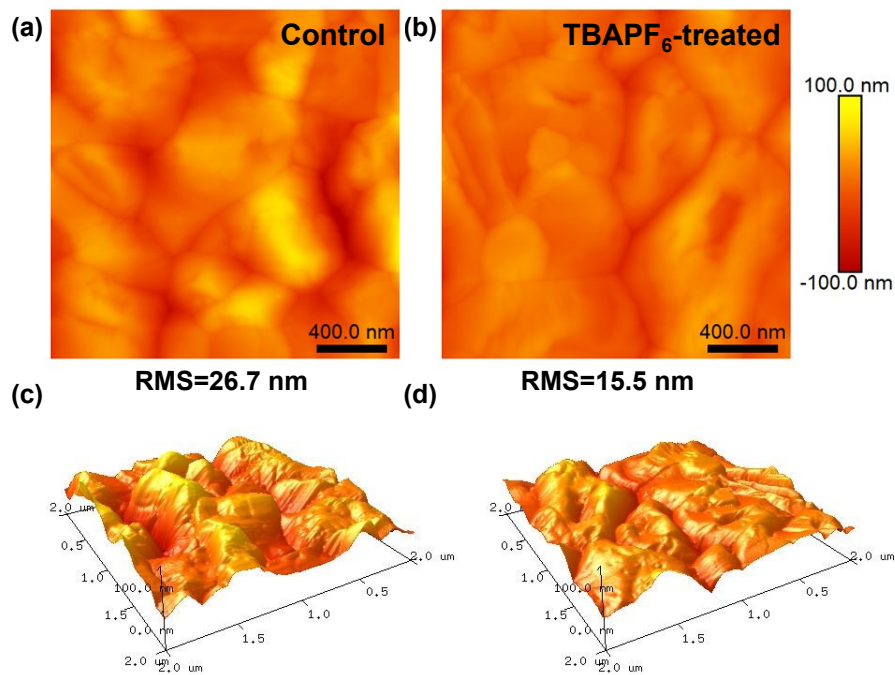

Fig. S10. AFM images of (a), (c) control and (b), (d) TBAPF<sub>6</sub>-treated films.

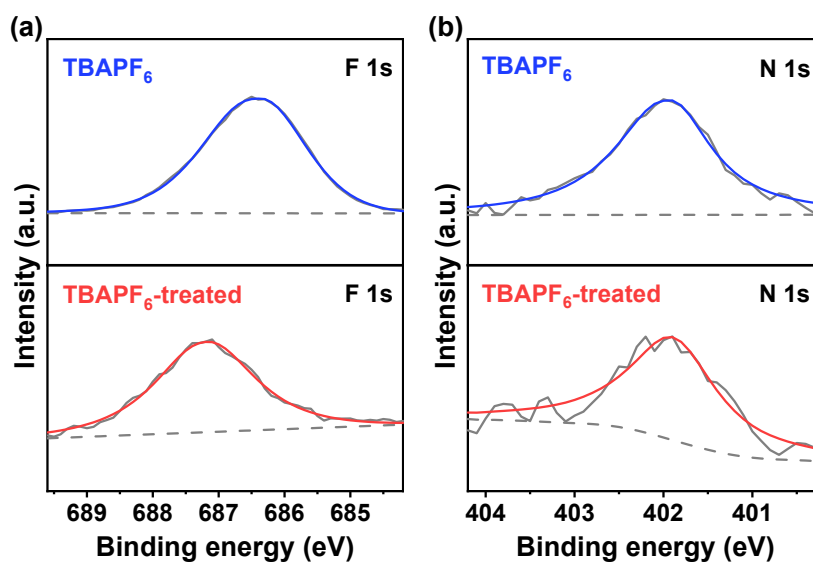

Fig. S11. XPS spectra of TBAPF<sub>6</sub> sample and TBAPF<sub>6</sub>-treated films. (a) F 1s, (b) N 1s.

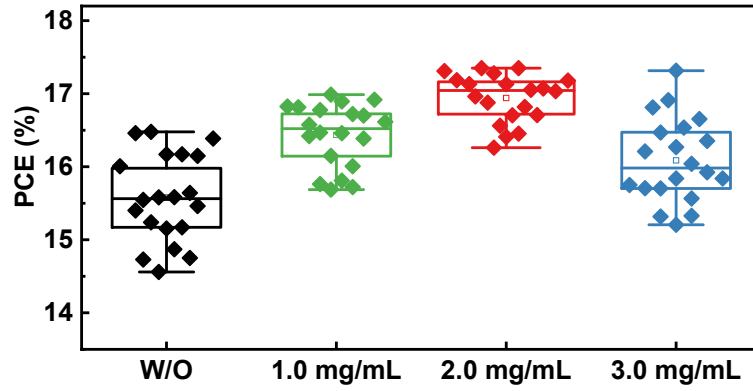

**Fig. S12.** PCEs statistics of C-PSCs treated with different concentrations of TBAPF<sub>6</sub>.

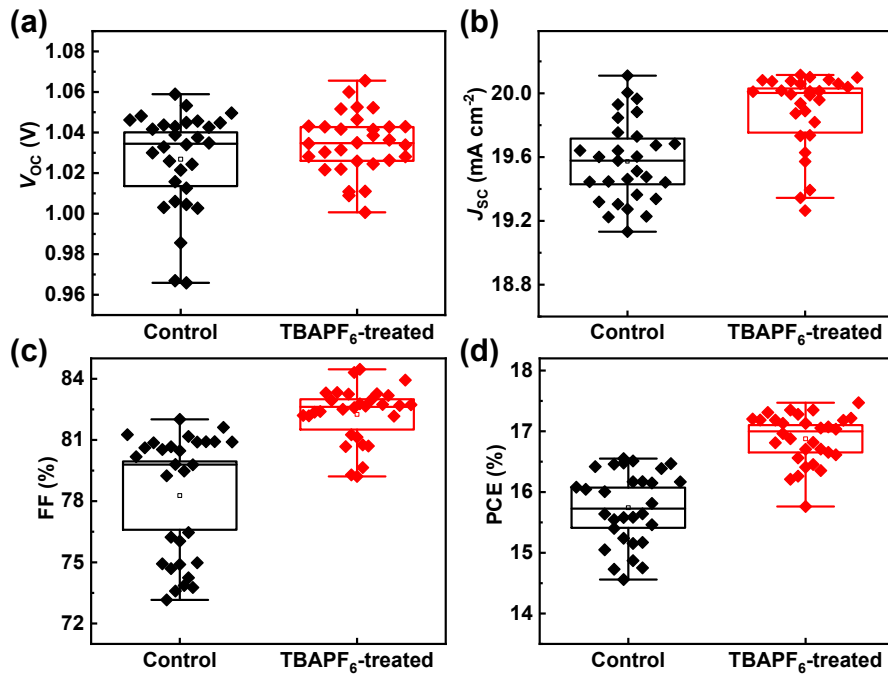

**Fig. S13.** Histograms of the (a)  $V_{oc}$ , (b)  $J_{sc}$ , (c) FF, and (d) PCE values based on the control and TBAPF<sub>6</sub>-treated devices.

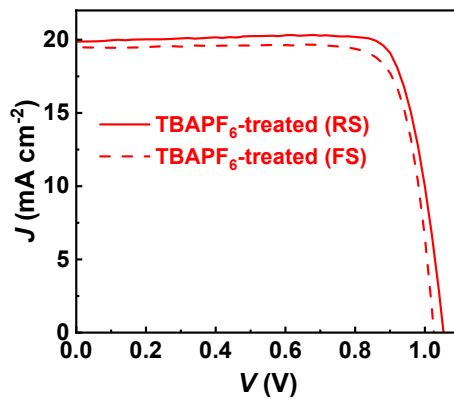

**Fig. S14.** Reverse scan (RS) and forward scan (FS) of TBAPF<sub>6</sub>-treated devices.

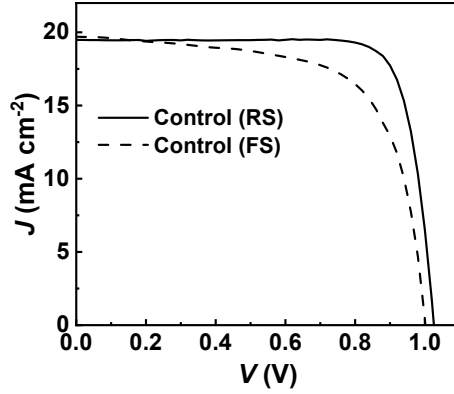

**Fig. S15.** Reverse scan and forward scan of control devices.

**Table S1.** Fitted parameters from TRPL spectra for the control and TBAPF<sub>6</sub>-treated films.

|                             | $\tau_1$ (ns) | $\tau_2$ (ns) | $f_1$ (%) | $f_2$ (%) | $\tau_{ave}$ (ns) |
|-----------------------------|---------------|---------------|-----------|-----------|-------------------|
| Control                     | 2.4           | 28.2          | 12.1      | 87.9      | 27.9              |
| TBAPF <sub>6</sub> -treated | 2.0           | 37.5          | 6.7       | 93.3      | 37.3              |

**Table S2.** Photovoltaic parameters of the control and TBAPF<sub>6</sub>-treated devices.

|                             | $V_{OC}$ (V) | $J_{SC}$ (mA cm) <sup>-2</sup> | FF (%) | PCE <sub>best</sub> (PCE <sub>avg</sub> ) (%) |
|-----------------------------|--------------|--------------------------------|--------|-----------------------------------------------|
| Control                     | 1.03         | 19.93                          | 80.9   | 16.55 (15.69 ± 0.86)                          |
| TBAPF <sub>6</sub> -treated | 1.06         | 20.01                          | 82.2   | 17.47 (16.72 ± 0.75)                          |

**Table S3.** Photovoltaic parameters of the control and TBAPF<sub>6</sub>-treated devices in the reverse scan and forward scan directions.

|                             |    | $V_{OC}$ (V) | $J_{SC}$ (mA cm) <sup>-2</sup> | FF (%) | PCE (%) | $h^a$ |
|-----------------------------|----|--------------|--------------------------------|--------|---------|-------|
| Control                     | RS | 1.03         | 19.48                          | 80.9   | 16.17   | 18.6% |
|                             | FS | 1.00         | 19.70                          | 66.8   | 13.17   |       |
| TBAPF <sub>6</sub> -treated | RS | 1.05         | 19.87                          | 83.2   | 17.41   | 8.5%  |
|                             | FS | 1.03         | 19.59                          | 79.2   | 15.94   |       |

<sup>a</sup> $h = (PCE_{RS} - PCE_{FS}) / PCE_{RS}$ , where RS and FS represent the reverse and forward scan directions, respectively.

## References

1. X. Tan, S. B. Wang, Q. X. Zhang, H. C. Liu, W. P. Li, L. Q. Zhu and H. N. Chen, *Matter*, 2023, **6**, 691-727.
2. X. Zhu, M. Du, J. Feng, H. Wang, Z. Xu, L. Wang, S. Zuo, C. Wang, Z. Wang, C. Zhang, X. Ren, S. Priya, D. Yang and S. Liu, *Angew. Chem. Int. Ed.*, 2021, **60**, 4238-4244.
3. X. Liu, X. Wang, T. Zhang, Y. Miao, Z. Qin, Y. Chen and Y. Zhao, *Angew. Chem. Int. Ed.*, 2021, **60**, 12351-12355.
4. T. Wu, W. X. Ji, L. G. Zhang, Q. Y. Chen, J. F. Fu, J. J. Zhang, Z. L. Zhang, Y. Zhou, B. Dong and B. Song, *J. Mater. Chem. A*, 2023, **11**, 3599-3607.
5. J. F. Fu, J. J. Zhang, T. Y. Zhang, L. G. Yuan, Z. L. Zhang, Z. X. Jiang, Z. Z. Huang, T. Wu, K. Y. Yan, L. G. Zhang, A. L. Wang, W. X. Ji, Y. Zhou and B. Song, *Acs Nano*, 2023, **17**, 2802-2812.
6. X. B. Chu, Q. F. Ye, Z. H. Wang, C. Zhang, F. Ma, Z. H. Qu, Y. Zhao, Z. G. Yin, H. X. Deng, X. W. Zhang and J. B. You, *Nat. Energy*, 2023, **8**, 372-380.
7. Y.-J. She, S.-P. Zhao, Z.-F. Tian and X.-M. Ren, *Inorg. Chem. Commun.*, 2014, **46**, 29-32.
